# Supplementary material for: Roles of Major Facilitator Superfamily Transporters in Phosphate Response in Drosophila
Source: PubMed Central journal article supplement (PMC3280997; doi:10.1371/journal.pone.0031730), 2012-02-16

**A**

|                          | <i>pho84</i>    | <i>MFS16</i>    | <i>MFS18</i>    | <i>MFS17</i>    | <i>MFS3</i>     | <i>MFS13</i>    | <i>MFS10</i>    | <i>MFS15</i>    | <i>MFS14</i>    |
|--------------------------|-----------------|-----------------|-----------------|-----------------|-----------------|-----------------|-----------------|-----------------|-----------------|
|                          | YML123C         | FBpp0071516     | FBpp0077146     | FBpp0112571     | FBpp0077623     | FBpp0079876     | FBpp0073555     | FBpp0085818     | FBpp0085817     |
| <i>pho84</i> YML123C     | 100.0% (587 AA) |                 |                 |                 |                 |                 |                 |                 |                 |
| <i>MFS16</i> FBpp0071516 | 11.3% (645 AA)  | 100.0% (566 AA) |                 |                 |                 |                 |                 |                 |                 |
| <i>MFS18</i> FBpp0077146 | 10.9% (595 AA)  | 12.3% (583 AA)  | 100.0% (439 AA) |                 |                 |                 |                 |                 |                 |
| <i>MFS17</i> FBpp0112571 | 7.6% (604 AA)   | 12.2% (582 AA)  | 17.7% (479 AA)  | 100.0% (445 AA) |                 |                 |                 |                 |                 |
| <i>MFS3</i> FBpp0077623  | 10.4% (616 AA)  | 13.0% (632 AA)  | 18.4% (528 AA)  | 22.4% (532 AA)  | 100.0% (512 AA) |                 |                 |                 |                 |
| <i>MFS13</i> FBpp0079876 | 11.9% (597 AA)  | 14.1% (618 AA)  | 17.7% (509 AA)  | 20.2% (516 AA)  | 27.5% (523 AA)  | 100.0% (496 AA) |                 |                 |                 |
| <i>MFS10</i> FBpp0073555 | 12.9% (628 AA)  | 13.9% (617 AA)  | 19.4% (568 AA)  | 22.0% (563 AA)  | 26.5% (589 AA)  | 29.5% (584 AA)  | 100.0% (559 AA) |                 |                 |
| <i>MFS15</i> FBpp0085818 | 12.5% (592 AA)  | 14.3% (614 AA)  | 19.2% (516 AA)  | 21.7% (531 AA)  | 27.8% (543 AA)  | 29.5% (522 AA)  | 29.7% (582 AA)  | 100.0% (497 AA) |                 |
| <i>MFS14</i> FBpp0085817 | 10.2% (598 AA)  | 13.0% (614 AA)  | 19.4% (509 AA)  | 21.8% (514 AA)  | 28.7% (523 AA)  | 29.1% (515 AA)  | 27.6% (572 AA)  | 45.2% (524 AA)  | 100.0% (497 AA) |

**B**

|                          | <i>pho84</i>    | <i>MFS16</i>    | <i>MFS18</i>    | <i>MFS17</i>    | <i>MFS3</i>     | <i>MFS13</i>    | <i>MFS10</i>    | <i>MFS15</i>    | <i>MFS14</i>    |
|--------------------------|-----------------|-----------------|-----------------|-----------------|-----------------|-----------------|-----------------|-----------------|-----------------|
|                          | YML123C         | FBpp0071516     | FBpp0077146     | FBpp0112571     | FBpp0077623     | FBpp0079876     | FBpp0073555     | FBpp0085818     | FBpp0085817     |
| <i>pho84</i> YML123C     | 100.0% (587 AA) |                 |                 |                 |                 |                 |                 |                 |                 |
| <i>MFS16</i> FBpp0071516 | 27.0% (100 AA)  | 100.0% (566 AA) |                 |                 |                 |                 |                 |                 |                 |
| <i>MFS18</i> FBpp0077146 | 28.6% (126 AA)  | 17.6% (165 AA)  | 100.0% (439 AA) |                 |                 |                 |                 |                 |                 |
| <i>MFS17</i> FBpp0112571 | 19.8% (86 AA)   | 19.1% (147 AA)  | 23.1% (350 AA)  | 100.0% (445 AA) |                 |                 |                 |                 |                 |
| <i>MFS3</i> FBpp0077623  | 18.9% (122 AA)  | 24.4% (168 AA)  | 24.9% (389 AA)  | 27.2% (444 AA)  | 100.0% (512 AA) |                 |                 |                 |                 |
| <i>MFS13</i> FBpp0079876 | 18.5% (157 AA)  | 24.4% (127 AA)  | 23.9% (397 AA)  | 27.5% (411 AA)  | 30.6% (487 AA)  | 100.0% (496 AA) |                 |                 |                 |
| <i>MFS10</i> FBpp0073555 | 27.5% (109 AA)  | 21.9% (151 AA)  | 26.9% (417 AA)  | 28.5% (445 AA)  | 28.5% (510 AA)  | 37.6% (484 AA)  | 100.0% (559 AA) |                 |                 |
| <i>MFS15</i> FBpp0085818 | 21.1% (133 AA)  | 19.2% (468 AA)  | 23.7% (438 AA)  | 28.6% (413 AA)  | 32.4% (485 AA)  | 32.6% (460 AA)  | 36.5% (490 AA)  | 100.0% (497 AA) |                 |
| <i>MFS14</i> FBpp0085817 | 22.1% (145 AA)  | 23.1% (208 AA)  | 24.8% (396 AA)  | 28.6% (413 AA)  | 30.6% (497 AA)  | 32.5% (427 AA)  | 33.3% (493 AA)  | 51.1% (464 AA)  | 100.0% (497 AA) |

**C**

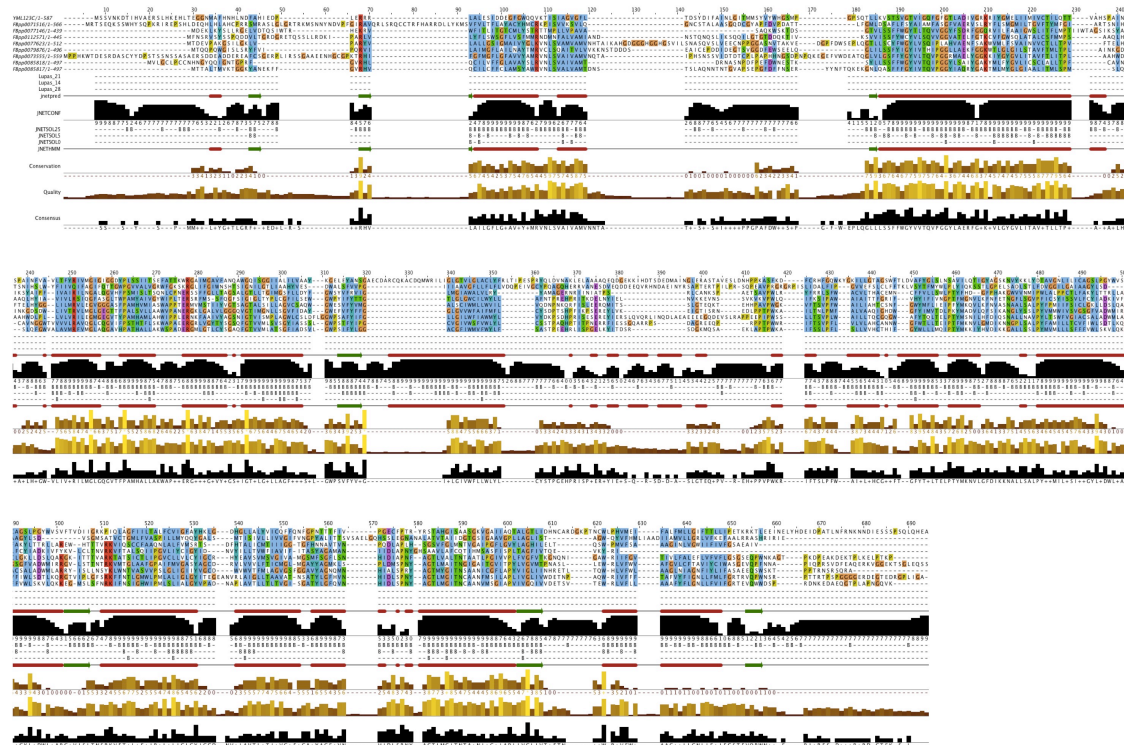

Supplement: pone.0031730.s002.pdf [file pone.0031730.s002.pdf]
